# Supplementary material
Source: Research Square preprint supplement (doi:10.21203/rs.3.rs-8744593/v1)
Supplement: Supplementary file 2 [file 1b6d092d842fddf30ae70aa1.xlsx]

## Sheet: UGC12732
	ρ(r) = ρ0sech^8( r/ r_c)
M(R) =4πρ0,r_c^3 ·I(u)		u = R/r_c	I(u) = Integrale de 0 à u de ( x^2sech^8(x)dx				V_TURI(R) = Racine (G·M(R)/R)
							G=	4.3009e-06	10^-6,KPC,(Km/s)^2/Mo
UGC12732	R_max=	15.4	V_obs(R_max)=	98
	M_totale=	V_obs^2(R_max).R_max/G=		3.43885e+10	Mo	I(infini)=	0.0648738
						M(R) = racine(G,M(R)/R)
	r_c=R_max=	15.4	ρ0=M_tot/4.π.r_c^3.I(infini)=	1.15497e+07	Mo/kpc^3	π=	3.14159
R	V_obs	Incer V_obs	u=R/r-c	I(U) par table	M(R)	V_TURI	Erreur %		calculs intermediaires de I(u)
0.96	34.2	3.32	0.0623377	8.21169e-05	4.35288e+07	13.9647	59.17		0.06	7.2353e-05	0.07	0.000114121	0.766234	0.233766
1.92	49.5	4.6	0.124675	0.000627023	3.32375e+08	27.2862	44.88		0.12	0.00055831	0.13	0.000705281	0.532468	0.467532
2.88	59.9	4.38	0.187013	0.00201195	1.0665e+09	39.9084	33.37		0.18	0.00180243	0.19	0.0021012	0.298701	0.701299
3.84	65.3	4.31	0.249351	0.004469	2.36894e+09	51.51	21.12		0.24	0.0040265	0.25	0.00449973	0.0649351	0.935065
4.8	69.8	3.83	0.311688	0.00806012	4.27253e+09	61.8731	11.36		0.31	0.00794677	0.32	0.00861814	0.831169	0.168831
5.76	73.8	3.45	0.374026	0.0126698	6.71606e+09	70.8151	4.04		0.37	0.0123432	0.38	0.0131545	0.597403	0.402597
6.72	76.2	3.24	0.436364	0.0180539	9.57008e+09	78.2623	2.71		0.43	0.0174761	0.44	0.0183841	0.363636	0.636364
7.68	79.3	3.19	0.498701	0.0238955	1.26666e+10	84.2227	6.21		0.49	0.0230649	0.5	0.0240195	0.12987	0.87013
8.64	80.3	3.31	0.561039	0.0298603	1.58284e+10	88.765	10.54		0.56	0.0297618	0.57	0.0307096	0.896104	0.103896
9.6	81.9	3.69	0.623377	0.0356437	1.88941e+10	92.0042	12.34		0.62	0.0353406	0.63	0.0362384	0.662338	0.337662
10.6	84	3.89	0.688312	0.0412207	2.18504e+10	94.1579	12.09		0.68	0.0405405	0.69	0.0413589	0.168831	0.831169
11.5	85.6	3.67	0.746753	0.0457007	2.42252e+10	95.1841	11.2		0.74	0.0452137	0.75	0.0459348	0.324675	0.675325
12.5	87.9	3.43	0.811688	0.0499974	2.65028e+10	95.4927	8.64		0.81	0.0498963	0.82	0.0504951	0.831169	0.168831
13.4	90.8	3.36	0.87013	0.0532361	2.82196e+10	95.1706	4.81		0.87	0.0532297	0.88	0.0537258	0.987013	0.012987
14.4	95.5	3.18	0.935065	0.0561673	2.97734e+10	94.3001	1.26		0.93	0.0559641	0.94	0.0563653	0.493506	0.506494
15.4	98	3.18	1	0.0584738	3.0996e+10	93.0405	5.06		1	0.0584738	1.01	0.0587786	1	0
						Erreur moy	15.55
	Précision=	84.45	%
R	V_Obs	Incer V_Obs	V_TURI	A=(V_obs-V_TURI)^2	A/Incer V_Obs^2
0.96	34.2	3.32	13.96	409.66	37.17
1.92	49.5	4.6	27.29	493.28	23.31
2.88	59.9	4.38	39.91	399.6	20.83
3.84	65.3	4.31	51.51	190.16	10.24
4.8	69.8	3.83	61.87	62.88	4.29
5.76	73.8	3.45	70.82	8.88	0.75
6.72	76.2	3.24	78.26	4.24	0.4
7.68	79.3	3.19	84.22	24.21	2.38
8.64	80.3	3.31	88.76	71.57	6.53
9.6	81.9	3.69	92	102.01	7.49
10.6	84	3.89	94.16	103.23	6.82
11.5	85.6	3.67	95.18	91.78	6.81
12.5	87.9	3.43	95.49	57.61	4.9
13.4	90.8	3.36	95.17	19.1	1.69
14.4	95.5	3.18	94.3	1.44	0.14
15.4	98	3.18	93.04	24.6	2.43
				X^2/d_f=	8.51

## Sheet: Integrale
							u	I(u) = Integrale de 0 à u de ( x^2sech^8(x)dx
							0	0
							0.01	4.998e-07
							0.02	2.9964e-06
							0.03	9.477e-06
							0.04	2.19098e-05
							0.05	4.22345e-05
							0.06	7.2353e-05
							0.07	0.000114121
							0.08	0.000169338
							0.09	0.00023974
							0.1	0.000326993
							0.11	0.000432683
							0.12	0.00055831
							0.13	0.000705281
							0.14	0.000874905
							0.15	0.00106839
							0.16	0.00128683
							0.17	0.00153122
							0.18	0.00180243
							0.19	0.0021012
							0.2	0.00242817
							0.21	0.00278386
							0.22	0.00316865
							0.23	0.00358281
							0.24	0.0040265
							0.25	0.00449973
							0.26	0.00500242
							0.27	0.00553437
							0.28	0.00609525
							0.29	0.00668465
							0.3	0.00730203
							0.31	0.00794677
							0.32	0.00861814
							0.33	0.00931532
							0.34	0.0100374
							0.35	0.0107835
							0.36	0.0115524
							0.37	0.0123432
							0.38	0.0131545
							0.39	0.0139853
							0.4	0.0148341
							0.41	0.0156998
							0.42	0.0165809
							0.43	0.0174761
							0.44	0.0183841
							0.45	0.0193033
							0.46	0.0202324
							0.47	0.02117
							0.48	0.0221146
							0.49	0.0230649
							0.5	0.0240195
							0.51	0.0249769
							0.52	0.025936
							0.53	0.0268952
							0.54	0.0278534
							0.55	0.0288094
							0.56	0.0297618
							0.57	0.0307096
							0.58	0.0316515
							0.59	0.0325866
							0.6	0.0335138
							0.61	0.0344321
							0.62	0.0353406
							0.63	0.0362384
							0.64	0.0371247
							0.65	0.0379988
							0.66	0.0388598
							0.67	0.0397073
							0.68	0.0405405
							0.69	0.0413589
							0.7	0.042162
							0.71	0.0429495
							0.72	0.0437208
							0.73	0.0444756
							0.74	0.0452137
							0.75	0.0459348
							0.76	0.0466387
							0.77	0.0473253
							0.78	0.0479944
							0.79	0.0486459
							0.8	0.0492799
							0.81	0.0498963
							0.82	0.0504951
							0.83	0.0510765
							0.84	0.0516405
							0.85	0.0521872
							0.86	0.0527169
							0.87	0.0532297
							0.88	0.0537258
							0.89	0.0542054
							0.9	0.0546687
							0.91	0.0551161
							0.92	0.0555478
							0.93	0.0559641
							0.94	0.0563653
							0.95	0.0567517
							0.96	0.0571237
							0.97	0.0574816
							0.98	0.0578256
							0.99	0.0581563
							1	0.0584738
							1.01	0.0587786
							1.02	0.0590711
							1.03	0.0593515
							1.04	0.0596202
							1.05	0.0598777
							1.06	0.0601242
							1.07	0.06036
							1.08	0.0605857
							1.09	0.0608014
							1.1	0.0610075
							1.11	0.0612044
							1.12	0.0613924
							1.13	0.0615718
							1.14	0.061743
							1.15	0.0619061
							1.16	0.0620617
							1.17	0.0622099
							1.18	0.062351
							1.19	0.0624853
							1.2	0.0626131
							1.21	0.0627347
							1.22	0.0628503
							1.23	0.0629602
							1.24	0.0630646
							1.25	0.0631638
							1.26	0.063258
							1.27	0.0633474
							1.28	0.0634321
							1.29	0.0635126
							1.3	0.0635888
							1.31	0.0636611
							1.32	0.0637296
							1.33	0.0637945
							1.34	0.0638559
							1.35	0.0639141
							1.36	0.0639691
							1.37	0.0640212
							1.38	0.0640705
							1.39	0.064117
							1.4	0.0641611
							1.41	0.0642027
							1.42	0.064242
							1.43	0.0642791
							1.44	0.0643142
							1.45	0.0643473
							1.46	0.0643785
							1.47	0.064408
							1.48	0.0644358
							1.49	0.064462
							1.5	0.0644867
							1.51	0.06451
							1.52	0.064532
							1.53	0.0645527
							1.54	0.0645722
							1.55	0.0645905
							1.56	0.0646078
							1.57	0.0646241
							1.58	0.0646394
							1.59	0.0646538
							1.6	0.0646674
							1.61	0.0646801
							1.62	0.0646921
							1.63	0.0647034
							1.64	0.064714
							1.65	0.0647239
							1.66	0.0647333
							1.67	0.0647421
							1.68	0.0647504
							1.69	0.0647581
							1.7	0.0647654
							1.71	0.0647723
							1.72	0.0647787
							1.73	0.0647847
							1.74	0.0647904
							1.75	0.0647957
							1.76	0.0648007
							1.77	0.0648053
							1.78	0.0648097
							1.79	0.0648138
							1.8	0.0648177
							1.81	0.0648213
							1.82	0.0648247
							1.83	0.0648278
							1.84	0.0648308
							1.85	0.0648336
							1.86	0.0648362
							1.87	0.0648386
							1.88	0.0648409
							1.89	0.0648431
							1.9	0.0648451
							1.91	0.0648469
							1.92	0.0648487
							1.93	0.0648503
							1.94	0.0648519
							1.95	0.0648533
							1.96	0.0648547
							1.97	0.0648559
							1.98	0.0648571
							1.99	0.0648582
							2	0.0648592
							2.01	0.0648602
							2.02	0.0648611
							2.03	0.0648619
							2.04	0.0648627
							2.05	0.0648635
							2.06	0.0648642
							2.07	0.0648648
							2.08	0.0648654
							2.09	0.064866
							2.1	0.0648665
							2.11	0.064867
							2.12	0.0648674
							2.13	0.0648679
							2.14	0.0648683
							2.15	0.0648686
							2.16	0.064869
							2.17	0.0648693
							2.18	0.0648696
							2.19	0.0648699
							2.2	0.0648702
							2.21	0.0648704
							2.22	0.0648706
							2.23	0.0648709
							2.24	0.0648711
							2.25	0.0648712
							2.26	0.0648714
							2.27	0.0648716
							2.28	0.0648717
							2.29	0.0648719
							2.3	0.064872
							2.31	0.0648721
							2.32	0.0648722
							2.33	0.0648724
							2.34	0.0648725
							2.35	0.0648725
							2.36	0.0648726
							2.37	0.0648727
							2.38	0.0648728
							2.39	0.0648729
							2.4	0.0648729
							2.41	0.064873
							2.42	0.064873
							2.43	0.0648731
							2.44	0.0648731
							2.45	0.0648732
							2.46	0.0648732
							2.47	0.0648733
							2.48	0.0648733
							2.49	0.0648733
							2.5	0.0648734
							2.51	0.0648734
							2.52	0.0648734
							2.53	0.0648735
							2.54	0.0648735
							2.55	0.0648735
							2.56	0.0648735
							2.57	0.0648736
							2.58	0.0648736
							2.59	0.0648736
							2.6	0.0648736
							2.61	0.0648736
							2.62	0.0648736
							2.63	0.0648736
							2.64	0.0648737
							2.65	0.0648737
							2.66	0.0648737
							2.67	0.0648737
							2.68	0.0648737
							2.69	0.0648737
							2.7	0.0648737
							2.71	0.0648737
							2.72	0.0648737
							2.73	0.0648737
							2.74	0.0648737
							2.75	0.0648737
							2.76	0.0648738
							2.77	0.0648738
							2.78	0.0648738
							2.79	0.0648738
							2.8	0.0648738
							2.81	0.0648738
							2.82	0.0648738
							2.83	0.0648738
							2.84	0.0648738
							2.85	0.0648738
							2.86	0.0648738
							2.87	0.0648738
							2.88	0.0648738
							2.89	0.0648738
							2.9	0.0648738
							2.91	0.0648738
							2.92	0.0648738
							2.93	0.0648738
							2.94	0.0648738
							2.95	0.0648738
							2.96	0.0648738
							2.97	0.0648738
							2.98	0.0648738
							2.99	0.0648738
							3	0.0648738
							3.1	0.0648738
							3.2	0.0648738
							3.3	0.0648738
							3.4	0.0648738
							3.5	0.0648738
							3.6	0.0648738
							3.7	0.0648738
							3.8	0.0648738
							3.9	0.0648738
							4	0.0648738
							4.1	0.0648738
							4.2	0.0648738
							4.3	0.0648738
							4.4	0.0648738
							4.5	0.0648738
							4.6	0.0648738
							4.7	0.0648738
							4.8	0.0648738
							4.9	0.0648738
							5	0.0648738
							5.1	0.0648738
							5.2	0.0648738
							5.3	0.0648738
							5.4	0.0648738
							5.5	0.0648738
							5.6	0.0648738
							5.7	0.0648738
							5.8	0.0648738
							5.9	0.0648738
							6	0.0648738
							6.1	0.0648738
							6.2	0.0648738
							6.3	0.0648738
							6.4	0.0648738
							6.5	0.0648738
							6.6	0.0648738
							6.7	0.0648738
							6.8	0.0648738
							6.9	0.0648738
							7	0.0648738
							7.1	0.0648738
							7.2	0.0648738
							7.3	0.0648738
							7.4	0.0648738
							7.5	0.0648738
							7.6	0.0648738
							7.7	0.0648738
							7.8	0.0648738
							7.9	0.0648738
							8	0.0648738
							8.1	0.0648738
							8.2	0.0648738
							8.3	0.0648738
							8.4	0.0648738
							8.5	0.0648738
							8.6	0.0648738
							8.7	0.0648738
							8.8	0.0648738
							8.9	0.0648738
							9	0.0648738
							9.1	0.0648738
							9.2	0.0648738
							9.3	0.0648738
							9.4	0.0648738
							9.5	0.0648738
							9.6	0.0648738
							9.7	0.0648738
							9.8	0.0648738
							9.9	0.0648738
							10	0.0648738
