# Supplementary material
Source: Research Square preprint supplement (doi:10.21203/rs.3.rs-8744593/v1)
Supplement: Supplementary file 3 [file 26a9a6158797fd9cce7f1cb9.xlsx]

## Sheet: UGC06614
	ρ(r) = ρ0sech^8( r/ r_c)
M(R) =4πρ0,r_c^3 ·I(u)		u = R/r_c	I(u) = Integrale de 0 à u de ( x^2sech^8(x)dx				V_TURI(R) = Racine (G·M(R)/R)
							G=	4.3009e-06	10^-6,KPC,(Km/s)^2/Mo
UGC06614	R_max=	64.59	V_obs(R_max)=	194
	M_totale=	V_obs^2(R_max).R_max/G=		5.65209e+11	Mo	I(infini)=	0.0648738
						M(R) = racine(G,M(R)/R)
	r_c=R_max/1,82=	35.489	ρ0=M_tot/4.π.r_c^3.I(infini)=	1.55113e+07	Mo/kpc^3	π=	3.14159
R	V_obs	Incer V_obs	u=R/r-c	I(U) par table	M(R)	V_TURI	Erreur %		calculs intermediaires de I(u)
3.23	194	16.7	0.0910141	0.000248588	2.16581e+09	53.7018	72.32		0.09	0.00023974	0.1	0.000326993	0.898591	0.101409
9.18	172	8.1	0.258672	0.00493564	4.30015e+10	141.938	17.48		0.25	0.00449973	0.26	0.00500242	0.132838	0.867162
10.64	170	10.7	0.299811	0.00729037	6.35169e+10	160.234	5.74		0.29	0.00668465	0.3	0.00730203	0.0188884	0.981112
11.58	170	6.8	0.326298	0.00905724	7.89107e+10	171.196	0.7		0.32	0.00861814	0.33	0.00931532	0.370181	0.629819
12.52	171	6.8	0.352785	0.0109977	9.58165e+10	181.425	6.1		0.35	0.0107835	0.36	0.0115524	0.721474	0.278526
13.57	172	12.1	0.382372	0.0133516	1.16325e+11	192.011	11.63		0.38	0.0131545	0.39	0.0139853	0.762812	0.237188
15.76	174	19.6	0.444081	0.0187592	1.63439e+11	211.193	21.38		0.44	0.0183841	0.45	0.0193033	0.591887	0.408113
24.94	193	23.2	0.702753	0.0423788	3.69223e+11	252.334	30.74		0.7	0.042162	0.71	0.0429495	0.724725	0.275275
26.3	194	23	0.741074	0.0452912	3.94597e+11	254.026	30.94		0.74	0.0452137	0.75	0.0459348	0.892553	0.107447
34.96	201	7.2	0.985094	0.057994	5.0527e+11	249.319	24.04		0.98	0.0578256	0.99	0.0581563	0.490633	0.509367
36.84	202	17.1	1.03807	0.0595683	5.18985e+11	246.149	21.86		1.03	0.0593515	1.04	0.0596202	0.193219	0.806781
47.38	205	16	1.33506	0.0638256	5.56077e+11	224.672	9.6		1.33	0.0637945	1.34	0.0638559	0.493885	0.506115
64.59	204	16	1.82	0.0648247	5.64781e+11	193.926	4.94		1.81	0.0648213	1.82	0.0648247	2.22045e-14	1
						Erreur moy	19.81
	Précision=	80.19	%
R	V_Obs	Incer V_Obs	V_TURI	A=(V_obs-V_TURI)^2	A/Incer V_Obs^2
3.23	194	16.7	53.7	19684.1	70.58
9.18	172	8.1	141.94	903.6	13.77
10.64	170	10.7	160.23	95.45	0.83
11.58	170	6.8	171.2	1.44	0.03
12.52	171	6.8	181.43	108.78	2.35
13.57	172	12.1	192.01	400.4	2.73
15.76	174	19.6	211.19	1383.1	3.6
24.94	193	23.2	252.33	3520.05	6.54
26.3	194	23	254.03	3603.6	6.81
34.96	201	7.2	249.32	2334.82	45.04
36.84	202	17.1	246.15	1949.22	6.67
47.38	205	16	224.67	386.91	1.51
64.59	204	16	193.93	101.4	0.4
				X^2/d_f=	13.41

## Sheet: Integrale
							u	I(u) = Integrale de 0 à u de ( x^2sech^8(x)dx
							0	0
							0.01	4.998e-07
							0.02	2.9964e-06
							0.03	9.477e-06
							0.04	2.19098e-05
							0.05	4.22345e-05
							0.06	7.2353e-05
							0.07	0.000114121
							0.08	0.000169338
							0.09	0.00023974
							0.1	0.000326993
							0.11	0.000432683
							0.12	0.00055831
							0.13	0.000705281
							0.14	0.000874905
							0.15	0.00106839
							0.16	0.00128683
							0.17	0.00153122
							0.18	0.00180243
							0.19	0.0021012
							0.2	0.00242817
							0.21	0.00278386
							0.22	0.00316865
							0.23	0.00358281
							0.24	0.0040265
							0.25	0.00449973
							0.26	0.00500242
							0.27	0.00553437
							0.28	0.00609525
							0.29	0.00668465
							0.3	0.00730203
							0.31	0.00794677
							0.32	0.00861814
							0.33	0.00931532
							0.34	0.0100374
							0.35	0.0107835
							0.36	0.0115524
							0.37	0.0123432
							0.38	0.0131545
							0.39	0.0139853
							0.4	0.0148341
							0.41	0.0156998
							0.42	0.0165809
							0.43	0.0174761
							0.44	0.0183841
							0.45	0.0193033
							0.46	0.0202324
							0.47	0.02117
							0.48	0.0221146
							0.49	0.0230649
							0.5	0.0240195
							0.51	0.0249769
							0.52	0.025936
							0.53	0.0268952
							0.54	0.0278534
							0.55	0.0288094
							0.56	0.0297618
							0.57	0.0307096
							0.58	0.0316515
							0.59	0.0325866
							0.6	0.0335138
							0.61	0.0344321
							0.62	0.0353406
							0.63	0.0362384
							0.64	0.0371247
							0.65	0.0379988
							0.66	0.0388598
							0.67	0.0397073
							0.68	0.0405405
							0.69	0.0413589
							0.7	0.042162
							0.71	0.0429495
							0.72	0.0437208
							0.73	0.0444756
							0.74	0.0452137
							0.75	0.0459348
							0.76	0.0466387
							0.77	0.0473253
							0.78	0.0479944
							0.79	0.0486459
							0.8	0.0492799
							0.81	0.0498963
							0.82	0.0504951
							0.83	0.0510765
							0.84	0.0516405
							0.85	0.0521872
							0.86	0.0527169
							0.87	0.0532297
							0.88	0.0537258
							0.89	0.0542054
							0.9	0.0546687
							0.91	0.0551161
							0.92	0.0555478
							0.93	0.0559641
							0.94	0.0563653
							0.95	0.0567517
							0.96	0.0571237
							0.97	0.0574816
							0.98	0.0578256
							0.99	0.0581563
							1	0.0584738
							1.01	0.0587786
							1.02	0.0590711
							1.03	0.0593515
							1.04	0.0596202
							1.05	0.0598777
							1.06	0.0601242
							1.07	0.06036
							1.08	0.0605857
							1.09	0.0608014
							1.1	0.0610075
							1.11	0.0612044
							1.12	0.0613924
							1.13	0.0615718
							1.14	0.061743
							1.15	0.0619061
							1.16	0.0620617
							1.17	0.0622099
							1.18	0.062351
							1.19	0.0624853
							1.2	0.0626131
							1.21	0.0627347
							1.22	0.0628503
							1.23	0.0629602
							1.24	0.0630646
							1.25	0.0631638
							1.26	0.063258
							1.27	0.0633474
							1.28	0.0634321
							1.29	0.0635126
							1.3	0.0635888
							1.31	0.0636611
							1.32	0.0637296
							1.33	0.0637945
							1.34	0.0638559
							1.35	0.0639141
							1.36	0.0639691
							1.37	0.0640212
							1.38	0.0640705
							1.39	0.064117
							1.4	0.0641611
							1.41	0.0642027
							1.42	0.064242
							1.43	0.0642791
							1.44	0.0643142
							1.45	0.0643473
							1.46	0.0643785
							1.47	0.064408
							1.48	0.0644358
							1.49	0.064462
							1.5	0.0644867
							1.51	0.06451
							1.52	0.064532
							1.53	0.0645527
							1.54	0.0645722
							1.55	0.0645905
							1.56	0.0646078
							1.57	0.0646241
							1.58	0.0646394
							1.59	0.0646538
							1.6	0.0646674
							1.61	0.0646801
							1.62	0.0646921
							1.63	0.0647034
							1.64	0.064714
							1.65	0.0647239
							1.66	0.0647333
							1.67	0.0647421
							1.68	0.0647504
							1.69	0.0647581
							1.7	0.0647654
							1.71	0.0647723
							1.72	0.0647787
							1.73	0.0647847
							1.74	0.0647904
							1.75	0.0647957
							1.76	0.0648007
							1.77	0.0648053
							1.78	0.0648097
							1.79	0.0648138
							1.8	0.0648177
							1.81	0.0648213
							1.82	0.0648247
							1.83	0.0648278
							1.84	0.0648308
							1.85	0.0648336
							1.86	0.0648362
							1.87	0.0648386
							1.88	0.0648409
							1.89	0.0648431
							1.9	0.0648451
							1.91	0.0648469
							1.92	0.0648487
							1.93	0.0648503
							1.94	0.0648519
							1.95	0.0648533
							1.96	0.0648547
							1.97	0.0648559
							1.98	0.0648571
							1.99	0.0648582
							2	0.0648592
							2.01	0.0648602
							2.02	0.0648611
							2.03	0.0648619
							2.04	0.0648627
							2.05	0.0648635
							2.06	0.0648642
							2.07	0.0648648
							2.08	0.0648654
							2.09	0.064866
							2.1	0.0648665
							2.11	0.064867
							2.12	0.0648674
							2.13	0.0648679
							2.14	0.0648683
							2.15	0.0648686
							2.16	0.064869
							2.17	0.0648693
							2.18	0.0648696
							2.19	0.0648699
							2.2	0.0648702
							2.21	0.0648704
							2.22	0.0648706
							2.23	0.0648709
							2.24	0.0648711
							2.25	0.0648712
							2.26	0.0648714
							2.27	0.0648716
							2.28	0.0648717
							2.29	0.0648719
							2.3	0.064872
							2.31	0.0648721
							2.32	0.0648722
							2.33	0.0648724
							2.34	0.0648725
							2.35	0.0648725
							2.36	0.0648726
							2.37	0.0648727
							2.38	0.0648728
							2.39	0.0648729
							2.4	0.0648729
							2.41	0.064873
							2.42	0.064873
							2.43	0.0648731
							2.44	0.0648731
							2.45	0.0648732
							2.46	0.0648732
							2.47	0.0648733
							2.48	0.0648733
							2.49	0.0648733
							2.5	0.0648734
							2.51	0.0648734
							2.52	0.0648734
							2.53	0.0648735
							2.54	0.0648735
							2.55	0.0648735
							2.56	0.0648735
							2.57	0.0648736
							2.58	0.0648736
							2.59	0.0648736
							2.6	0.0648736
							2.61	0.0648736
							2.62	0.0648736
							2.63	0.0648736
							2.64	0.0648737
							2.65	0.0648737
							2.66	0.0648737
							2.67	0.0648737
							2.68	0.0648737
							2.69	0.0648737
							2.7	0.0648737
							2.71	0.0648737
							2.72	0.0648737
							2.73	0.0648737
							2.74	0.0648737
							2.75	0.0648737
							2.76	0.0648738
							2.77	0.0648738
							2.78	0.0648738
							2.79	0.0648738
							2.8	0.0648738
							2.81	0.0648738
							2.82	0.0648738
							2.83	0.0648738
							2.84	0.0648738
							2.85	0.0648738
							2.86	0.0648738
							2.87	0.0648738
							2.88	0.0648738
							2.89	0.0648738
							2.9	0.0648738
							2.91	0.0648738
							2.92	0.0648738
							2.93	0.0648738
							2.94	0.0648738
							2.95	0.0648738
							2.96	0.0648738
							2.97	0.0648738
							2.98	0.0648738
							2.99	0.0648738
							3	0.0648738
							3.1	0.0648738
							3.2	0.0648738
							3.3	0.0648738
							3.4	0.0648738
							3.5	0.0648738
							3.6	0.0648738
							3.7	0.0648738
							3.8	0.0648738
							3.9	0.0648738
							4	0.0648738
							4.1	0.0648738
							4.2	0.0648738
							4.3	0.0648738
							4.4	0.0648738
							4.5	0.0648738
							4.6	0.0648738
							4.7	0.0648738
							4.8	0.0648738
							4.9	0.0648738
							5	0.0648738
							5.1	0.0648738
							5.2	0.0648738
							5.3	0.0648738
							5.4	0.0648738
							5.5	0.0648738
							5.6	0.0648738
							5.7	0.0648738
							5.8	0.0648738
							5.9	0.0648738
							6	0.0648738
							6.1	0.0648738
							6.2	0.0648738
							6.3	0.0648738
							6.4	0.0648738
							6.5	0.0648738
							6.6	0.0648738
							6.7	0.0648738
							6.8	0.0648738
							6.9	0.0648738
							7	0.0648738
							7.1	0.0648738
							7.2	0.0648738
							7.3	0.0648738
							7.4	0.0648738
							7.5	0.0648738
							7.6	0.0648738
							7.7	0.0648738
							7.8	0.0648738
							7.9	0.0648738
							8	0.0648738
							8.1	0.0648738
							8.2	0.0648738
							8.3	0.0648738
							8.4	0.0648738
							8.5	0.0648738
							8.6	0.0648738
							8.7	0.0648738
							8.8	0.0648738
							8.9	0.0648738
							9	0.0648738
							9.1	0.0648738
							9.2	0.0648738
							9.3	0.0648738
							9.4	0.0648738
							9.5	0.0648738
							9.6	0.0648738
							9.7	0.0648738
							9.8	0.0648738
							9.9	0.0648738
							10	0.0648738
