# Supplementary material
Source: Research Square preprint supplement (doi:10.21203/rs.3.rs-8744593/v1)
Supplement: Supplementary file 5 [file 34957a41c9b3307af48f86b6.xlsx]

## Sheet: NGC024
	ρ(r) = ρ0sech^8( r/ r_c)
M(R) =4πρ0,r_c^3 ·I(u)		u = R/r_c	I(u) = Integrale de 0 à u de ( x^2sech^8(x)dx				V_TURI(R) = Racine (G·M(R)/R)
							G=	4.3009e-06	10^-6,KPC,(Km/s)^2/Mo
NGC0247	R_max=	14.54	V_obs(R_max)=	107
	M_totale=	V_obs^2(R_max).R_max/G=		3.87055e+10	Mo	I(infini)=	0.0648738
						M(R) = racine(G,M(R)/R)
	r_c=R_max/1,2=	12.1167	ρ0=M_tot/4.π.r_c^3.I(infini)/1,17=	2.28117e+07	Mo/kpc^3	π=	3.14159
R	V_obs	Incer V_obs	u=R/r-c	I(U) par table	M(R)	V_TURI	Erreur %		calculs intermediaires de I(u)
1.08	34.6	0.9	0.0891334	0.000233639	1.19141e+08	21.7821	37.05		0.08	0.000169338	0.09	0.00023974	0.0866575	0.913343
1.61	47	0.8	0.132875	0.000754045	3.84516e+08	32.0497	31.81		0.13	0.000705281	0.14	0.000874905	0.712517	0.287483
2.15	59.1	3.1	0.177442	0.00173304	8.83742e+08	42.0459	28.86		0.17	0.00153122	0.18	0.00180243	0.255846	0.744154
2.7	64.4	1.4	0.222834	0.003286	1.67566e+09	51.6643	19.78		0.22	0.00316865	0.23	0.00358281	0.716644	0.283356
3.22	67.4	2.3	0.26575	0.00530827	2.70689e+09	60.1294	10.79		0.26	0.00500242	0.27	0.00553437	0.425034	0.574966
3.77	69.8	0.7	0.311142	0.00802342	4.09144e+09	68.3199	2.12		0.31	0.00794677	0.32	0.00861814	0.885832	0.114168
4.31	71.3	1.1	0.355708	0.0112224	5.72274e+09	75.5689	5.99		0.35	0.0107835	0.36	0.0115524	0.429161	0.570839
4.85	73.2	1.7	0.400275	0.0148579	7.57663e+09	81.9685	11.98		0.4	0.0148341	0.41	0.0156998	0.97249	0.0275103
5.38	75.1	3	0.444017	0.0187533	9.563e+09	87.4351	16.42		0.44	0.0183841	0.45	0.0193033	0.598349	0.401651
5.92	78.5	3.8	0.488583	0.0229303	1.1693e+10	92.1684	17.41		0.48	0.0221146	0.49	0.0230649	0.141678	0.858322
6.46	81.4	5	0.53315	0.0271971	1.38688e+10	96.0911	18.05		0.53	0.0268952	0.54	0.0278534	0.685007	0.314993
6.99	83.5	7	0.576891	0.0313587	1.5991e+10	99.1925	18.79		0.57	0.0307096	0.58	0.0316515	0.310867	0.689133
7.53	87.1	7.2	0.621458	0.0354715	1.80883e+10	101.644	16.7		0.62	0.0353406	0.63	0.0362384	0.854195	0.145805
8.07	90.7	4.8	0.666025	0.0393704	2.00765e+10	103.44	14.05		0.66	0.0388598	0.67	0.0397073	0.397524	0.602476
8.62	93.1	1.4	0.711417	0.0430587	2.19573e+10	104.668	12.43		0.71	0.0429495	0.72	0.0437208	0.858322	0.141678
9.14	95.9	2.1	0.754333	0.0462398	2.35794e+10	105.335	9.84		0.75	0.0459348	0.76	0.0466387	0.566713	0.433287
9.69	98.4	5.2	0.799725	0.0492624	2.51208e+10	105.593	7.31		0.79	0.0486459	0.8	0.0492799	0.0275103	0.97249
10.23	101	8.2	0.844292	0.0518751	2.64531e+10	105.458	4.41		0.84	0.0516405	0.85	0.0521872	0.570839	0.429161
10.76	103	9.4	0.888033	0.054111	2.75933e+10	105.021	1.96		0.88	0.0537258	0.89	0.0542054	0.196699	0.803301
11.3	104	9.4	0.9326	0.0560684	2.85914e+10	104.318	0.31		0.93	0.0559641	0.94	0.0563653	0.740028	0.259972
11.84	105	8.9	0.977166	0.0577281	2.94378e+10	103.408	1.52		0.97	0.0574816	0.98	0.0578256	0.283356	0.716644
12.38	105	8.4	1.02173	0.0591197	3.01474e+10	102.34	2.53		1.02	0.0590711	1.03	0.0593515	0.826685	0.173315
12.91	105	9	1.06547	0.0602533	3.07254e+10	101.173	3.64		1.06	0.0601242	1.07	0.06036	0.452545	0.547455
13.48	106	8.4	1.11252	0.0612517	3.12346e+10	99.8281	5.82		1.11	0.0612044	1.12	0.0613924	0.748281	0.251719
14.01	108	7.7	1.15626	0.0620035	3.16179e+10	98.5207	8.78		1.15	0.0619061	1.16	0.0620617	0.37414	0.62586
14.54	107	9.2	1.2	0.0626131	3.19288e+10	97.1827	9.18		1.2	0.0626131	1.21	0.0627347	1	0
						Erreur moy	12.21
	Précision=	87.79	%
R	V_Obs	Incer V_Obs	V_TURI	A=(V_obs-V_TURI)^2	A/Incer V_Obs^2
1.08	34.6	0.9	21.78	164.35	202.9
1.61	47	0.8	32.05	223.5	349.22
2.15	59.1	3.1	42.05	290.7	30.25
2.7	64.4	1.4	51.66	162.31	82.81
3.22	67.4	2.3	60.13	52.85	9.99
3.77	69.8	0.7	68.32	2.19	4.47
4.31	71.3	1.1	75.57	18.23	15.07
4.85	73.2	1.7	81.97	76.91	26.61
5.38	75.1	3	87.44	152.28	16.92
5.92	78.5	3.8	92.17	186.87	12.94
6.46	81.4	5	96.09	215.8	8.63
6.99	83.5	7	99.19	246.18	5.02
7.53	87.1	7.2	101.64	211.41	4.08
8.07	90.7	4.8	103.44	162.31	7.04
8.62	93.1	1.4	104.67	133.86	68.3
9.14	95.9	2.1	105.34	89.11	20.21
9.69	98.4	5.2	105.59	51.7	1.91
10.23	101	8.2	105.46	19.89	0.3
10.76	103	9.4	105.02	4.08	0.05
11.3	104	9.4	104.32	0.1	0
11.84	105	8.9	103.41	2.53	0.03
12.38	105	8.4	102.34	7.08	0.1
12.91	105	9	101.17	14.67	0.18
13.48	106	8.4	99.83	38.07	0.54
14.01	108	7.7	98.52	89.87	1.52
14.54	107	9.2	97.18	96.43	1.14
				X^2/d_f=	36.26

## Sheet: Integrale
							u	I(u) = Integrale de 0 à u de ( x^2sech^8(x)dx
							0	0
							0.01	4.998e-07
							0.02	2.9964e-06
							0.03	9.477e-06
							0.04	2.19098e-05
							0.05	4.22345e-05
							0.06	7.2353e-05
							0.07	0.000114121
							0.08	0.000169338
							0.09	0.00023974
							0.1	0.000326993
							0.11	0.000432683
							0.12	0.00055831
							0.13	0.000705281
							0.14	0.000874905
							0.15	0.00106839
							0.16	0.00128683
							0.17	0.00153122
							0.18	0.00180243
							0.19	0.0021012
							0.2	0.00242817
							0.21	0.00278386
							0.22	0.00316865
							0.23	0.00358281
							0.24	0.0040265
							0.25	0.00449973
							0.26	0.00500242
							0.27	0.00553437
							0.28	0.00609525
							0.29	0.00668465
							0.3	0.00730203
							0.31	0.00794677
							0.32	0.00861814
							0.33	0.00931532
							0.34	0.0100374
							0.35	0.0107835
							0.36	0.0115524
							0.37	0.0123432
							0.38	0.0131545
							0.39	0.0139853
							0.4	0.0148341
							0.41	0.0156998
							0.42	0.0165809
							0.43	0.0174761
							0.44	0.0183841
							0.45	0.0193033
							0.46	0.0202324
							0.47	0.02117
							0.48	0.0221146
							0.49	0.0230649
							0.5	0.0240195
							0.51	0.0249769
							0.52	0.025936
							0.53	0.0268952
							0.54	0.0278534
							0.55	0.0288094
							0.56	0.0297618
							0.57	0.0307096
							0.58	0.0316515
							0.59	0.0325866
							0.6	0.0335138
							0.61	0.0344321
							0.62	0.0353406
							0.63	0.0362384
							0.64	0.0371247
							0.65	0.0379988
							0.66	0.0388598
							0.67	0.0397073
							0.68	0.0405405
							0.69	0.0413589
							0.7	0.042162
							0.71	0.0429495
							0.72	0.0437208
							0.73	0.0444756
							0.74	0.0452137
							0.75	0.0459348
							0.76	0.0466387
							0.77	0.0473253
							0.78	0.0479944
							0.79	0.0486459
							0.8	0.0492799
							0.81	0.0498963
							0.82	0.0504951
							0.83	0.0510765
							0.84	0.0516405
							0.85	0.0521872
							0.86	0.0527169
							0.87	0.0532297
							0.88	0.0537258
							0.89	0.0542054
							0.9	0.0546687
							0.91	0.0551161
							0.92	0.0555478
							0.93	0.0559641
							0.94	0.0563653
							0.95	0.0567517
							0.96	0.0571237
							0.97	0.0574816
							0.98	0.0578256
							0.99	0.0581563
							1	0.0584738
							1.01	0.0587786
							1.02	0.0590711
							1.03	0.0593515
							1.04	0.0596202
							1.05	0.0598777
							1.06	0.0601242
							1.07	0.06036
							1.08	0.0605857
							1.09	0.0608014
							1.1	0.0610075
							1.11	0.0612044
							1.12	0.0613924
							1.13	0.0615718
							1.14	0.061743
							1.15	0.0619061
							1.16	0.0620617
							1.17	0.0622099
							1.18	0.062351
							1.19	0.0624853
							1.2	0.0626131
							1.21	0.0627347
							1.22	0.0628503
							1.23	0.0629602
							1.24	0.0630646
							1.25	0.0631638
							1.26	0.063258
							1.27	0.0633474
							1.28	0.0634321
							1.29	0.0635126
							1.3	0.0635888
							1.31	0.0636611
							1.32	0.0637296
							1.33	0.0637945
							1.34	0.0638559
							1.35	0.0639141
							1.36	0.0639691
							1.37	0.0640212
							1.38	0.0640705
							1.39	0.064117
							1.4	0.0641611
							1.41	0.0642027
							1.42	0.064242
							1.43	0.0642791
							1.44	0.0643142
							1.45	0.0643473
							1.46	0.0643785
							1.47	0.064408
							1.48	0.0644358
							1.49	0.064462
							1.5	0.0644867
							1.51	0.06451
							1.52	0.064532
							1.53	0.0645527
							1.54	0.0645722
							1.55	0.0645905
							1.56	0.0646078
							1.57	0.0646241
							1.58	0.0646394
							1.59	0.0646538
							1.6	0.0646674
							1.61	0.0646801
							1.62	0.0646921
							1.63	0.0647034
							1.64	0.064714
							1.65	0.0647239
							1.66	0.0647333
							1.67	0.0647421
							1.68	0.0647504
							1.69	0.0647581
							1.7	0.0647654
							1.71	0.0647723
							1.72	0.0647787
							1.73	0.0647847
							1.74	0.0647904
							1.75	0.0647957
							1.76	0.0648007
							1.77	0.0648053
							1.78	0.0648097
							1.79	0.0648138
							1.8	0.0648177
							1.81	0.0648213
							1.82	0.0648247
							1.83	0.0648278
							1.84	0.0648308
							1.85	0.0648336
							1.86	0.0648362
							1.87	0.0648386
							1.88	0.0648409
							1.89	0.0648431
							1.9	0.0648451
							1.91	0.0648469
							1.92	0.0648487
							1.93	0.0648503
							1.94	0.0648519
							1.95	0.0648533
							1.96	0.0648547
							1.97	0.0648559
							1.98	0.0648571
							1.99	0.0648582
							2	0.0648592
							2.01	0.0648602
							2.02	0.0648611
							2.03	0.0648619
							2.04	0.0648627
							2.05	0.0648635
							2.06	0.0648642
							2.07	0.0648648
							2.08	0.0648654
							2.09	0.064866
							2.1	0.0648665
							2.11	0.064867
							2.12	0.0648674
							2.13	0.0648679
							2.14	0.0648683
							2.15	0.0648686
							2.16	0.064869
							2.17	0.0648693
							2.18	0.0648696
							2.19	0.0648699
							2.2	0.0648702
							2.21	0.0648704
							2.22	0.0648706
							2.23	0.0648709
							2.24	0.0648711
							2.25	0.0648712
							2.26	0.0648714
							2.27	0.0648716
							2.28	0.0648717
							2.29	0.0648719
							2.3	0.064872
							2.31	0.0648721
							2.32	0.0648722
							2.33	0.0648724
							2.34	0.0648725
							2.35	0.0648725
							2.36	0.0648726
							2.37	0.0648727
							2.38	0.0648728
							2.39	0.0648729
							2.4	0.0648729
							2.41	0.064873
							2.42	0.064873
							2.43	0.0648731
							2.44	0.0648731
							2.45	0.0648732
							2.46	0.0648732
							2.47	0.0648733
							2.48	0.0648733
							2.49	0.0648733
							2.5	0.0648734
							2.51	0.0648734
							2.52	0.0648734
							2.53	0.0648735
							2.54	0.0648735
							2.55	0.0648735
							2.56	0.0648735
							2.57	0.0648736
							2.58	0.0648736
							2.59	0.0648736
							2.6	0.0648736
							2.61	0.0648736
							2.62	0.0648736
							2.63	0.0648736
							2.64	0.0648737
							2.65	0.0648737
							2.66	0.0648737
							2.67	0.0648737
							2.68	0.0648737
							2.69	0.0648737
							2.7	0.0648737
							2.71	0.0648737
							2.72	0.0648737
							2.73	0.0648737
							2.74	0.0648737
							2.75	0.0648737
							2.76	0.0648738
							2.77	0.0648738
							2.78	0.0648738
							2.79	0.0648738
							2.8	0.0648738
							2.81	0.0648738
							2.82	0.0648738
							2.83	0.0648738
							2.84	0.0648738
							2.85	0.0648738
							2.86	0.0648738
							2.87	0.0648738
							2.88	0.0648738
							2.89	0.0648738
							2.9	0.0648738
							2.91	0.0648738
							2.92	0.0648738
							2.93	0.0648738
							2.94	0.0648738
							2.95	0.0648738
							2.96	0.0648738
							2.97	0.0648738
							2.98	0.0648738
							2.99	0.0648738
							3	0.0648738
							3.1	0.0648738
							3.2	0.0648738
							3.3	0.0648738
							3.4	0.0648738
							3.5	0.0648738
							3.6	0.0648738
							3.7	0.0648738
							3.8	0.0648738
							3.9	0.0648738
							4	0.0648738
							4.1	0.0648738
							4.2	0.0648738
							4.3	0.0648738
							4.4	0.0648738
							4.5	0.0648738
							4.6	0.0648738
							4.7	0.0648738
							4.8	0.0648738
							4.9	0.0648738
							5	0.0648738
							5.1	0.0648738
							5.2	0.0648738
							5.3	0.0648738
							5.4	0.0648738
							5.5	0.0648738
							5.6	0.0648738
							5.7	0.0648738
							5.8	0.0648738
							5.9	0.0648738
							6	0.0648738
							6.1	0.0648738
							6.2	0.0648738
							6.3	0.0648738
							6.4	0.0648738
							6.5	0.0648738
							6.6	0.0648738
							6.7	0.0648738
							6.8	0.0648738
							6.9	0.0648738
							7	0.0648738
							7.1	0.0648738
							7.2	0.0648738
							7.3	0.0648738
							7.4	0.0648738
							7.5	0.0648738
							7.6	0.0648738
							7.7	0.0648738
							7.8	0.0648738
							7.9	0.0648738
							8	0.0648738
							8.1	0.0648738
							8.2	0.0648738
							8.3	0.0648738
							8.4	0.0648738
							8.5	0.0648738
							8.6	0.0648738
							8.7	0.0648738
							8.8	0.0648738
							8.9	0.0648738
							9	0.0648738
							9.1	0.0648738
							9.2	0.0648738
							9.3	0.0648738
							9.4	0.0648738
							9.5	0.0648738
							9.6	0.0648738
							9.7	0.0648738
							9.8	0.0648738
							9.9	0.0648738
							10	0.0648738
