# Supplementary material
Source: Research Square preprint supplement (doi:10.21203/rs.3.rs-8744593/v1)
Supplement: Supplementary file 7 [file 3db45762285c1d668cdaf628.xlsx]

## Sheet: NGC0289
	ρ(r) = ρ0sech^8( r/ r_c)
M(R) =4πρ0,r_c^3 ·I(u)		u = R/r_c	I(u) = Integrale de 0 à u de ( x^2sech^8(x)dx				V_TURI(R) = Racine (G·M(R)/R)
							G=	4.3009e-06	10^-6,KPC,(Km/s)^2/Mo
NGC0289	R_max=	71.12	V_obs(R_max)=	165
	M_totale=	V_obs^2(R_max).R_max/G=		4.50195e+11	Mo	I(infini)=	0.0648738
						M(R) = racine(G,M(R)/R)
	r_c=R_max/2=	35.56	ρ0=M_tot/4.π.r_c^3.I(infini)=	1.22811e+07	Mo/kpc^3	π=	3.14159
R	V_obs	Incer V_obs	u=R/r-c	I(U) par table	M(R)	V_TURI	Erreur %		calculs intermediaires de I(u)
1.5	164	28.2	0.0421822	2.63451e-05	1.82823e+08	22.8955	86.04	1	0.04	2.19098e-05	0.05	4.22345e-05	0.781777	0.218223
2.52	194	32	0.0708661	0.000118903	8.25134e+08	37.5268	80.66	2	0.07	0.000114121	0.08	0.000169338	0.913386	0.0866142
3.46	175	25.2	0.0973003	0.000303438	2.10572e+09	51.1613	70.76	3	0.09	0.00023974	0.1	0.000326993	0.269966	0.730034
4.32	185	31.5	0.121485	0.000580132	4.02585e+09	63.3092	65.78	4	0.12	0.00055831	0.13	0.000705281	0.851519	0.148481
5.43	175	27.9	0.1527	0.00112736	7.82338e+09	78.7185	55.02	5	0.15	0.00106839	0.16	0.00128683	0.730034	0.269966
6.38	167	27.2	0.179415	0.00178656	1.23979e+10	91.4205	45.26	6	0.17	0.00153122	0.18	0.00180243	0.0584927	0.941507
7.57	176	7.18	0.21288	0.00289466	2.00876e+10	106.831	39.3	7	0.21	0.00278386	0.22	0.00316865	0.712036	0.287964
10.6	185	4.29	0.298088	0.00718397	4.98535e+10	142.225	23.12	8	0.29	0.00668465	0.3	0.00730203	0.191226	0.808774
13.57	183	4.22	0.381609	0.0132882	9.22137e+10	170.957	6.58	9	0.38	0.0131545	0.39	0.0139853	0.839145	0.160855
16.64	172	4.33	0.467942	0.020977	1.45571e+11	193.972	12.77	10	0.46	0.0202324	0.47	0.02117	0.205849	0.794151
19.71	161	4.24	0.554274	0.0292165	2.02749e+11	210.337	30.64	11	0.55	0.0288094	0.56	0.0297618	0.572553	0.427447
22.68	156	5.08	0.637795	0.0369293	2.56272e+11	220.449	41.31	12	0.63	0.0362384	0.64	0.0371247	0.220472	0.779528
25.75	159	6.49	0.724128	0.0440324	3.05565e+11	225.914	42.08	13	0.72	0.0437208	0.73	0.0444756	0.587177	0.412823
28.72	173	6.97	0.807649	0.0497513	3.45252e+11	227.382	31.43	14	0.8	0.0492799	0.81	0.0498963	0.235096	0.764904
31.79	177	6.57	0.893982	0.0543899	3.77441e+11	225.974	27.67	15	0.89	0.0542054	0.9	0.0546687	0.6018	0.3982
34.77	179	4.47	0.977784	0.0577494	4.00754e+11	222.647	24.38	16	0.97	0.0574816	0.98	0.0578256	0.221597	0.778403
37.84	181	4.26	1.06412	0.0602213	4.17908e+11	217.944	20.41	17	1.06	0.0601242	1.07	0.06036	0.588301	0.411699
40.81	182	4.26	1.14764	0.0618676	4.29333e+11	212.713	16.88	18	1.14	0.061743	1.15	0.0619061	0.23622	0.76378
43.88	182	4.83	1.23397	0.0630017	4.37203e+11	207.008	13.74	19	1.23	0.0629602	1.24	0.0630646	0.602925	0.397075
46.85	180	5.5	1.31749	0.0637124	4.42135e+11	201.466	11.93	20	1.31	0.0636611	1.32	0.0637296	0.250844	0.749156
49.92	177	8.5	1.40382	0.064177	4.45359e+11	195.883	10.67	21	1.4	0.0641611	1.41	0.0642027	0.617548	0.382452
52.99	175	11	1.49016	0.0644624	4.47339e+11	190.547	8.88	22	1.49	0.064462	1.5	0.0644867	0.984252	0.015748
55.96	172	11.6	1.57368	0.0646297	4.48501e+11	185.662	7.94	23	1.57	0.0646241	1.58	0.0646394	0.632171	0.367829
59.03	168	12.6	1.66001	0.0647333	4.4922e+11	180.914	7.69	24	1.66	0.0647333	1.67	0.0647421	0.998875	0.00112486
62	158	5.38	1.74353	0.0647922	4.49629e+11	176.608	11.78	25	1.74	0.0647904	1.75	0.0647957	0.646794	0.353206
65.07	158	6.5	1.82987	0.0648278	4.49875e+11	172.439	9.14	26	1.82	0.0648247	1.83	0.0648278	0.0134983	0.986502
68.05	166	15.5	1.91367	0.0648476	4.50013e+11	168.647	1.59	27	1.91	0.0648469	1.92	0.0648487	0.633296	0.366704
71.12	165	8.75	2	0.0648592	4.50093e+11	164.981	0.01	28	2	0.0648592	2.01	0.0648602	1	0
						Erreur moy	28.7
	Précision=	71.3	%
R	V_Obs	Incer V_Obs	V_TURI	A=(V_obs-V_TURI)^2	A/Incer V_Obs^2
1.5	164	28.2	22.9	19909.2	25.04
2.52	194	32	37.53	24482.9	23.91
3.46	175	25.2	51.16	15336.4	24.15
4.32	185	31.5	63.31	14808.5	14.92
5.43	175	27.9	78.72	9269.84	11.91
6.38	167	27.2	91.42	5712.34	7.72
7.57	176	7.18	106.83	4784.49	92.81
10.6	185	4.29	142.22	1830.13	99.44
13.57	183	4.22	170.96	144.96	8.14
16.64	172	4.33	193.97	482.68	25.74
19.71	161	4.24	210.34	2434.44	135.42
22.68	156	5.08	220.45	4153.8	160.96
25.75	159	6.49	225.91	4476.95	106.29
28.72	173	6.97	227.38	2957.18	60.87
31.79	177	6.57	225.97	2398.06	55.56
34.77	179	4.47	222.65	1905.32	95.36
37.84	181	4.26	217.94	1364.56	75.19
40.81	182	4.26	212.71	943.1	51.97
43.88	182	4.83	207.01	625.5	26.81
46.85	180	5.5	201.47	460.96	15.24
49.92	177	8.5	195.88	356.45	4.93
52.99	175	11	190.55	241.8	2
55.96	172	11.6	185.66	186.6	1.39
59.03	168	12.6	180.91	166.67	1.05
62	158	5.38	176.61	346.33	11.97
65.07	158	6.5	172.44	208.51	4.94
68.05	166	15.5	168.65	7.02	0.03
71.12	165	8.75	164.98	0	0
				X^2/d_f=	43.99

## Sheet: Integrale
							u	I(u) = Integrale de 0 à u de ( x^2sech^8(x)dx
							0	0
							0.01	4.998e-07
							0.02	2.9964e-06
							0.03	9.477e-06
							0.04	2.19098e-05
							0.05	4.22345e-05
							0.06	7.2353e-05
							0.07	0.000114121
							0.08	0.000169338
							0.09	0.00023974
							0.1	0.000326993
							0.11	0.000432683
							0.12	0.00055831
							0.13	0.000705281
							0.14	0.000874905
							0.15	0.00106839
							0.16	0.00128683
							0.17	0.00153122
							0.18	0.00180243
							0.19	0.0021012
							0.2	0.00242817
							0.21	0.00278386
							0.22	0.00316865
							0.23	0.00358281
							0.24	0.0040265
							0.25	0.00449973
							0.26	0.00500242
							0.27	0.00553437
							0.28	0.00609525
							0.29	0.00668465
							0.3	0.00730203
							0.31	0.00794677
							0.32	0.00861814
							0.33	0.00931532
							0.34	0.0100374
							0.35	0.0107835
							0.36	0.0115524
							0.37	0.0123432
							0.38	0.0131545
							0.39	0.0139853
							0.4	0.0148341
							0.41	0.0156998
							0.42	0.0165809
							0.43	0.0174761
							0.44	0.0183841
							0.45	0.0193033
							0.46	0.0202324
							0.47	0.02117
							0.48	0.0221146
							0.49	0.0230649
							0.5	0.0240195
							0.51	0.0249769
							0.52	0.025936
							0.53	0.0268952
							0.54	0.0278534
							0.55	0.0288094
							0.56	0.0297618
							0.57	0.0307096
							0.58	0.0316515
							0.59	0.0325866
							0.6	0.0335138
							0.61	0.0344321
							0.62	0.0353406
							0.63	0.0362384
							0.64	0.0371247
							0.65	0.0379988
							0.66	0.0388598
							0.67	0.0397073
							0.68	0.0405405
							0.69	0.0413589
							0.7	0.042162
							0.71	0.0429495
							0.72	0.0437208
							0.73	0.0444756
							0.74	0.0452137
							0.75	0.0459348
							0.76	0.0466387
							0.77	0.0473253
							0.78	0.0479944
							0.79	0.0486459
							0.8	0.0492799
							0.81	0.0498963
							0.82	0.0504951
							0.83	0.0510765
							0.84	0.0516405
							0.85	0.0521872
							0.86	0.0527169
							0.87	0.0532297
							0.88	0.0537258
							0.89	0.0542054
							0.9	0.0546687
							0.91	0.0551161
							0.92	0.0555478
							0.93	0.0559641
							0.94	0.0563653
							0.95	0.0567517
							0.96	0.0571237
							0.97	0.0574816
							0.98	0.0578256
							0.99	0.0581563
							1	0.0584738
							1.01	0.0587786
							1.02	0.0590711
							1.03	0.0593515
							1.04	0.0596202
							1.05	0.0598777
							1.06	0.0601242
							1.07	0.06036
							1.08	0.0605857
							1.09	0.0608014
							1.1	0.0610075
							1.11	0.0612044
							1.12	0.0613924
							1.13	0.0615718
							1.14	0.061743
							1.15	0.0619061
							1.16	0.0620617
							1.17	0.0622099
							1.18	0.062351
							1.19	0.0624853
							1.2	0.0626131
							1.21	0.0627347
							1.22	0.0628503
							1.23	0.0629602
							1.24	0.0630646
							1.25	0.0631638
							1.26	0.063258
							1.27	0.0633474
							1.28	0.0634321
							1.29	0.0635126
							1.3	0.0635888
							1.31	0.0636611
							1.32	0.0637296
							1.33	0.0637945
							1.34	0.0638559
							1.35	0.0639141
							1.36	0.0639691
							1.37	0.0640212
							1.38	0.0640705
							1.39	0.064117
							1.4	0.0641611
							1.41	0.0642027
							1.42	0.064242
							1.43	0.0642791
							1.44	0.0643142
							1.45	0.0643473
							1.46	0.0643785
							1.47	0.064408
							1.48	0.0644358
							1.49	0.064462
							1.5	0.0644867
							1.51	0.06451
							1.52	0.064532
							1.53	0.0645527
							1.54	0.0645722
							1.55	0.0645905
							1.56	0.0646078
							1.57	0.0646241
							1.58	0.0646394
							1.59	0.0646538
							1.6	0.0646674
							1.61	0.0646801
							1.62	0.0646921
							1.63	0.0647034
							1.64	0.064714
							1.65	0.0647239
							1.66	0.0647333
							1.67	0.0647421
							1.68	0.0647504
							1.69	0.0647581
							1.7	0.0647654
							1.71	0.0647723
							1.72	0.0647787
							1.73	0.0647847
							1.74	0.0647904
							1.75	0.0647957
							1.76	0.0648007
							1.77	0.0648053
							1.78	0.0648097
							1.79	0.0648138
							1.8	0.0648177
							1.81	0.0648213
							1.82	0.0648247
							1.83	0.0648278
							1.84	0.0648308
							1.85	0.0648336
							1.86	0.0648362
							1.87	0.0648386
							1.88	0.0648409
							1.89	0.0648431
							1.9	0.0648451
							1.91	0.0648469
							1.92	0.0648487
							1.93	0.0648503
							1.94	0.0648519
							1.95	0.0648533
							1.96	0.0648547
							1.97	0.0648559
							1.98	0.0648571
							1.99	0.0648582
							2	0.0648592
							2.01	0.0648602
							2.02	0.0648611
							2.03	0.0648619
							2.04	0.0648627
							2.05	0.0648635
							2.06	0.0648642
							2.07	0.0648648
							2.08	0.0648654
							2.09	0.064866
							2.1	0.0648665
							2.11	0.064867
							2.12	0.0648674
							2.13	0.0648679
							2.14	0.0648683
							2.15	0.0648686
							2.16	0.064869
							2.17	0.0648693
							2.18	0.0648696
							2.19	0.0648699
							2.2	0.0648702
							2.21	0.0648704
							2.22	0.0648706
							2.23	0.0648709
							2.24	0.0648711
							2.25	0.0648712
							2.26	0.0648714
							2.27	0.0648716
							2.28	0.0648717
							2.29	0.0648719
							2.3	0.064872
							2.31	0.0648721
							2.32	0.0648722
							2.33	0.0648724
							2.34	0.0648725
							2.35	0.0648725
							2.36	0.0648726
							2.37	0.0648727
							2.38	0.0648728
							2.39	0.0648729
							2.4	0.0648729
							2.41	0.064873
							2.42	0.064873
							2.43	0.0648731
							2.44	0.0648731
							2.45	0.0648732
							2.46	0.0648732
							2.47	0.0648733
							2.48	0.0648733
							2.49	0.0648733
							2.5	0.0648734
							2.51	0.0648734
							2.52	0.0648734
							2.53	0.0648735
							2.54	0.0648735
							2.55	0.0648735
							2.56	0.0648735
							2.57	0.0648736
							2.58	0.0648736
							2.59	0.0648736
							2.6	0.0648736
							2.61	0.0648736
							2.62	0.0648736
							2.63	0.0648736
							2.64	0.0648737
							2.65	0.0648737
							2.66	0.0648737
							2.67	0.0648737
							2.68	0.0648737
							2.69	0.0648737
							2.7	0.0648737
							2.71	0.0648737
							2.72	0.0648737
							2.73	0.0648737
							2.74	0.0648737
							2.75	0.0648737
							2.76	0.0648738
							2.77	0.0648738
							2.78	0.0648738
							2.79	0.0648738
							2.8	0.0648738
							2.81	0.0648738
							2.82	0.0648738
							2.83	0.0648738
							2.84	0.0648738
							2.85	0.0648738
							2.86	0.0648738
							2.87	0.0648738
							2.88	0.0648738
							2.89	0.0648738
							2.9	0.0648738
							2.91	0.0648738
							2.92	0.0648738
							2.93	0.0648738
							2.94	0.0648738
							2.95	0.0648738
							2.96	0.0648738
							2.97	0.0648738
							2.98	0.0648738
							2.99	0.0648738
							3	0.0648738
							3.1	0.0648738
							3.2	0.0648738
							3.3	0.0648738
							3.4	0.0648738
							3.5	0.0648738
							3.6	0.0648738
							3.7	0.0648738
							3.8	0.0648738
							3.9	0.0648738
							4	0.0648738
							4.1	0.0648738
							4.2	0.0648738
							4.3	0.0648738
							4.4	0.0648738
							4.5	0.0648738
							4.6	0.0648738
							4.7	0.0648738
							4.8	0.0648738
							4.9	0.0648738
							5	0.0648738
							5.1	0.0648738
							5.2	0.0648738
							5.3	0.0648738
							5.4	0.0648738
							5.5	0.0648738
							5.6	0.0648738
							5.7	0.0648738
							5.8	0.0648738
							5.9	0.0648738
							6	0.0648738
							6.1	0.0648738
							6.2	0.0648738
							6.3	0.0648738
							6.4	0.0648738
							6.5	0.0648738
							6.6	0.0648738
							6.7	0.0648738
							6.8	0.0648738
							6.9	0.0648738
							7	0.0648738
							7.1	0.0648738
							7.2	0.0648738
							7.3	0.0648738
							7.4	0.0648738
							7.5	0.0648738
							7.6	0.0648738
							7.7	0.0648738
							7.8	0.0648738
							7.9	0.0648738
							8	0.0648738
							8.1	0.0648738
							8.2	0.0648738
							8.3	0.0648738
							8.4	0.0648738
							8.5	0.0648738
							8.6	0.0648738
							8.7	0.0648738
							8.8	0.0648738
							8.9	0.0648738
							9	0.0648738
							9.1	0.0648738
							9.2	0.0648738
							9.3	0.0648738
							9.4	0.0648738
							9.5	0.0648738
							9.6	0.0648738
							9.7	0.0648738
							9.8	0.0648738
							9.9	0.0648738
							10	0.0648738
