# Supplementary material
Source: Research Square preprint supplement (doi:10.21203/rs.3.rs-8744593/v1)
Supplement: Supplementary file 13 [file 625fcd45bd68f8eb5429d816.xlsx]

## Sheet: NGC0300
	ρ(r) = ρ0sech^8( r/ r_c)
M(R) =4πρ0,r_c^3 ·I(u)		u = R/r_c	I(u) = Integrale de 0 à u de ( x^2sech^8(x)dx				V_TURI(R) = Racine (G·M(R)/R)
							G=	4.3009e-06	10^-6,KPC,(Km/s)^2/Mo
NGC0300	R_max=	11.8	V_obs(R_max)=	93.5
	M_totale=	V_obs^2(R_max).R_max/G=		2.39853e+10	Mo	I(infini)=	0.0648738
						M(R) = racine(G,M(R)/R)
	r_c=R_max=	11.8	ρ0=M_tot/4.π.r_c^3.I(infini)=	1.79069e+07	Mo/kpc^3	π=	3.14159
R	V_obs	Incer V_obs	u=R/r-c	I(U) par table	M(R)	V_TURI	Erreur %		calculs intermediaires de I(u)
0.91	33.1	3.9	0.0771186	0.000153428	5.67257e+07	16.3738	50.53		0.07	0.000114121	0.08	0.000169338	0.288136	0.711864
1.36	46.7	2.7	0.115254	0.00049869	1.84377e+08	24.147	48.29		0.11	0.000432683	0.12	0.00055831	0.474576	0.525424
1.82	53.9	4.7	0.154237	0.00116095	4.2923e+08	31.8485	40.91		0.15	0.00106839	0.16	0.00128683	0.576271	0.423729
2.27	58.8	2.5	0.192373	0.00217878	8.05547e+08	39.0672	33.56		0.19	0.0021012	0.2	0.00242817	0.762712	0.237288
2.72	65.6	2.6	0.230508	0.00360537	1.33299e+09	45.9101	30.02		0.23	0.00358281	0.24	0.0040265	0.949153	0.0508475
3.17	70.8	2.7	0.268644	0.00546224	2.01951e+09	52.3448	26.07		0.26	0.00500242	0.27	0.00553437	0.135593	0.864407
3.63	82.1	4.9	0.307627	0.00779378	2.88154e+09	58.4304	28.83		0.3	0.00730203	0.31	0.00794677	0.237288	0.762712
4.08	84.1	6.6	0.345763	0.0104674	3.87002e+09	63.8714	24.05		0.34	0.0100374	0.35	0.0107835	0.423729	0.576271
4.54	83.4	6.2	0.384746	0.0135488	5.0093e+09	68.8874	17.4		0.38	0.0131545	0.39	0.0139853	0.525424	0.474576
4.99	81.5	2.7	0.422881	0.0168389	6.22572e+09	73.2528	10.12		0.42	0.0165809	0.43	0.0174761	0.711864	0.288136
5.45	80.8	4	0.461864	0.0204072	7.54501e+09	77.1634	4.5		0.46	0.0202324	0.47	0.02117	0.813559	0.186441
5.9	82.8	12.4	0.5	0.0240195	8.88055e+09	80.4588	2.83		0.5	0.0240195	0.51	0.0249769	1	0
6.36	88.2	11.7	0.538983	0.027756	1.0262e+10	83.3044	5.55		0.53	0.0268952	0.54	0.0278534	0.101695	0.898305
6.81	88.5	8.5	0.577119	0.0313801	1.16019e+10	85.5996	3.28		0.57	0.0307096	0.58	0.0316515	0.288136	0.711864
7.26	88.4	8.9	0.615254	0.0349094	1.29068e+10	87.4422	1.08		0.61	0.0344321	0.62	0.0353406	0.474576	0.525424
7.71	88.2	10.8	0.65339	0.0382906	1.41569e+10	88.8663	0.76		0.65	0.0379988	0.66	0.0388598	0.661017	0.338983
8.17	89.5	3.1	0.692373	0.0415495	1.53618e+10	89.9269	0.48		0.69	0.0413589	0.7	0.042162	0.762712	0.237288
8.62	89.7	9.5	0.730508	0.0445132	1.64575e+10	90.6167	1.02		0.73	0.0444756	0.74	0.0452137	0.949153	0.0508475
9.07	93.7	7.3	0.768644	0.0472322	1.74628e+10	90.9983	2.88		0.76	0.0466387	0.77	0.0473253	0.135593	0.864407
9.53	97	5.7	0.807627	0.04975	1.83937e+10	91.1104	6.07		0.8	0.0492799	0.81	0.0498963	0.237288	0.762712
9.96	96.2	1.5	0.844068	0.0518629	1.91749e+10	90.9948	5.41		0.84	0.0516405	0.85	0.0521872	0.59322	0.40678
10.45	94.8	2.1	0.885593	0.053994	1.99628e+10	90.6426	4.39		0.88	0.0537258	0.89	0.0542054	0.440678	0.559322
10.93	92.5	13.9	0.926271	0.0558089	2.06338e+10	90.1072	2.59		0.92	0.0555478	0.93	0.0559641	0.372881	0.627119
11.32	92.8	10.6	0.959322	0.0570985	2.11106e+10	89.5585	3.49		0.95	0.0567517	0.96	0.0571237	0.0677966	0.932203
11.8	93.5	12.1	1	0.0584738	2.16191e+10	88.7682	5.06		1	0.0584738	1.01	0.0587786	1	0
						Erreur moy	14.37
	Précision=	85.63	%
R	V_Obs	Incer V_Obs	V_TURI	A=(V_obs-V_TURI)^2	A/Incer V_Obs^2
0.91	33.1	3.9	16.37	279.89	18.4
1.36	46.7	2.7	24.15	508.5	69.75
1.82	53.9	4.7	31.85	486.2	22.01
2.27	58.8	2.5	39.07	389.27	62.28
2.72	65.6	2.6	45.91	387.7	57.35
3.17	70.8	2.7	52.34	340.77	46.74
3.63	82.1	4.9	58.43	560.27	23.33
4.08	84.1	6.6	63.87	409.25	9.4
4.54	83.4	6.2	68.89	210.54	5.48
4.99	81.5	2.7	73.25	68.06	9.34
5.45	80.8	4	77.16	13.25	0.83
5.9	82.8	12.4	80.46	5.48	0.04
6.36	88.2	11.7	83.3	24.01	0.18
6.81	88.5	8.5	85.6	8.41	0.12
7.26	88.4	8.9	87.44	0.92	0.01
7.71	88.2	10.8	88.87	0.45	0
8.17	89.5	3.1	89.93	0.18	0.02
8.62	89.7	9.5	90.62	0.85	0.01
9.07	93.7	7.3	91	7.29	0.14
9.53	97	5.7	91.11	34.69	1.07
9.96	96.2	1.5	90.99	27.14	12.06
10.45	94.8	2.1	90.64	17.31	3.93
10.93	92.5	13.9	90.11	5.71	0.03
11.32	92.8	10.6	89.56	10.5	0.09
11.8	93.5	12.1	88.77	22.37	0.15
				X^2/d_f=	13.71

## Sheet: Integrale
							u	I(u) = Integrale de 0 à u de ( x^2sech^8(x)dx
							0	0
							0.01	4.998e-07
							0.02	2.9964e-06
							0.03	9.477e-06
							0.04	2.19098e-05
							0.05	4.22345e-05
							0.06	7.2353e-05
							0.07	0.000114121
							0.08	0.000169338
							0.09	0.00023974
							0.1	0.000326993
							0.11	0.000432683
							0.12	0.00055831
							0.13	0.000705281
							0.14	0.000874905
							0.15	0.00106839
							0.16	0.00128683
							0.17	0.00153122
							0.18	0.00180243
							0.19	0.0021012
							0.2	0.00242817
							0.21	0.00278386
							0.22	0.00316865
							0.23	0.00358281
							0.24	0.0040265
							0.25	0.00449973
							0.26	0.00500242
							0.27	0.00553437
							0.28	0.00609525
							0.29	0.00668465
							0.3	0.00730203
							0.31	0.00794677
							0.32	0.00861814
							0.33	0.00931532
							0.34	0.0100374
							0.35	0.0107835
							0.36	0.0115524
							0.37	0.0123432
							0.38	0.0131545
							0.39	0.0139853
							0.4	0.0148341
							0.41	0.0156998
							0.42	0.0165809
							0.43	0.0174761
							0.44	0.0183841
							0.45	0.0193033
							0.46	0.0202324
							0.47	0.02117
							0.48	0.0221146
							0.49	0.0230649
							0.5	0.0240195
							0.51	0.0249769
							0.52	0.025936
							0.53	0.0268952
							0.54	0.0278534
							0.55	0.0288094
							0.56	0.0297618
							0.57	0.0307096
							0.58	0.0316515
							0.59	0.0325866
							0.6	0.0335138
							0.61	0.0344321
							0.62	0.0353406
							0.63	0.0362384
							0.64	0.0371247
							0.65	0.0379988
							0.66	0.0388598
							0.67	0.0397073
							0.68	0.0405405
							0.69	0.0413589
							0.7	0.042162
							0.71	0.0429495
							0.72	0.0437208
							0.73	0.0444756
							0.74	0.0452137
							0.75	0.0459348
							0.76	0.0466387
							0.77	0.0473253
							0.78	0.0479944
							0.79	0.0486459
							0.8	0.0492799
							0.81	0.0498963
							0.82	0.0504951
							0.83	0.0510765
							0.84	0.0516405
							0.85	0.0521872
							0.86	0.0527169
							0.87	0.0532297
							0.88	0.0537258
							0.89	0.0542054
							0.9	0.0546687
							0.91	0.0551161
							0.92	0.0555478
							0.93	0.0559641
							0.94	0.0563653
							0.95	0.0567517
							0.96	0.0571237
							0.97	0.0574816
							0.98	0.0578256
							0.99	0.0581563
							1	0.0584738
							1.01	0.0587786
							1.02	0.0590711
							1.03	0.0593515
							1.04	0.0596202
							1.05	0.0598777
							1.06	0.0601242
							1.07	0.06036
							1.08	0.0605857
							1.09	0.0608014
							1.1	0.0610075
							1.11	0.0612044
							1.12	0.0613924
							1.13	0.0615718
							1.14	0.061743
							1.15	0.0619061
							1.16	0.0620617
							1.17	0.0622099
							1.18	0.062351
							1.19	0.0624853
							1.2	0.0626131
							1.21	0.0627347
							1.22	0.0628503
							1.23	0.0629602
							1.24	0.0630646
							1.25	0.0631638
							1.26	0.063258
							1.27	0.0633474
							1.28	0.0634321
							1.29	0.0635126
							1.3	0.0635888
							1.31	0.0636611
							1.32	0.0637296
							1.33	0.0637945
							1.34	0.0638559
							1.35	0.0639141
							1.36	0.0639691
							1.37	0.0640212
							1.38	0.0640705
							1.39	0.064117
							1.4	0.0641611
							1.41	0.0642027
							1.42	0.064242
							1.43	0.0642791
							1.44	0.0643142
							1.45	0.0643473
							1.46	0.0643785
							1.47	0.064408
							1.48	0.0644358
							1.49	0.064462
							1.5	0.0644867
							1.51	0.06451
							1.52	0.064532
							1.53	0.0645527
							1.54	0.0645722
							1.55	0.0645905
							1.56	0.0646078
							1.57	0.0646241
							1.58	0.0646394
							1.59	0.0646538
							1.6	0.0646674
							1.61	0.0646801
							1.62	0.0646921
							1.63	0.0647034
							1.64	0.064714
							1.65	0.0647239
							1.66	0.0647333
							1.67	0.0647421
							1.68	0.0647504
							1.69	0.0647581
							1.7	0.0647654
							1.71	0.0647723
							1.72	0.0647787
							1.73	0.0647847
							1.74	0.0647904
							1.75	0.0647957
							1.76	0.0648007
							1.77	0.0648053
							1.78	0.0648097
							1.79	0.0648138
							1.8	0.0648177
							1.81	0.0648213
							1.82	0.0648247
							1.83	0.0648278
							1.84	0.0648308
							1.85	0.0648336
							1.86	0.0648362
							1.87	0.0648386
							1.88	0.0648409
							1.89	0.0648431
							1.9	0.0648451
							1.91	0.0648469
							1.92	0.0648487
							1.93	0.0648503
							1.94	0.0648519
							1.95	0.0648533
							1.96	0.0648547
							1.97	0.0648559
							1.98	0.0648571
							1.99	0.0648582
							2	0.0648592
							2.01	0.0648602
							2.02	0.0648611
							2.03	0.0648619
							2.04	0.0648627
							2.05	0.0648635
							2.06	0.0648642
							2.07	0.0648648
							2.08	0.0648654
							2.09	0.064866
							2.1	0.0648665
							2.11	0.064867
							2.12	0.0648674
							2.13	0.0648679
							2.14	0.0648683
							2.15	0.0648686
							2.16	0.064869
							2.17	0.0648693
							2.18	0.0648696
							2.19	0.0648699
							2.2	0.0648702
							2.21	0.0648704
							2.22	0.0648706
							2.23	0.0648709
							2.24	0.0648711
							2.25	0.0648712
							2.26	0.0648714
							2.27	0.0648716
							2.28	0.0648717
							2.29	0.0648719
							2.3	0.064872
							2.31	0.0648721
							2.32	0.0648722
							2.33	0.0648724
							2.34	0.0648725
							2.35	0.0648725
							2.36	0.0648726
							2.37	0.0648727
							2.38	0.0648728
							2.39	0.0648729
							2.4	0.0648729
							2.41	0.064873
							2.42	0.064873
							2.43	0.0648731
							2.44	0.0648731
							2.45	0.0648732
							2.46	0.0648732
							2.47	0.0648733
							2.48	0.0648733
							2.49	0.0648733
							2.5	0.0648734
							2.51	0.0648734
							2.52	0.0648734
							2.53	0.0648735
							2.54	0.0648735
							2.55	0.0648735
							2.56	0.0648735
							2.57	0.0648736
							2.58	0.0648736
							2.59	0.0648736
							2.6	0.0648736
							2.61	0.0648736
							2.62	0.0648736
							2.63	0.0648736
							2.64	0.0648737
							2.65	0.0648737
							2.66	0.0648737
							2.67	0.0648737
							2.68	0.0648737
							2.69	0.0648737
							2.7	0.0648737
							2.71	0.0648737
							2.72	0.0648737
							2.73	0.0648737
							2.74	0.0648737
							2.75	0.0648737
							2.76	0.0648738
							2.77	0.0648738
							2.78	0.0648738
							2.79	0.0648738
							2.8	0.0648738
							2.81	0.0648738
							2.82	0.0648738
							2.83	0.0648738
							2.84	0.0648738
							2.85	0.0648738
							2.86	0.0648738
							2.87	0.0648738
							2.88	0.0648738
							2.89	0.0648738
							2.9	0.0648738
							2.91	0.0648738
							2.92	0.0648738
							2.93	0.0648738
							2.94	0.0648738
							2.95	0.0648738
							2.96	0.0648738
							2.97	0.0648738
							2.98	0.0648738
							2.99	0.0648738
							3	0.0648738
							3.1	0.0648738
							3.2	0.0648738
							3.3	0.0648738
							3.4	0.0648738
							3.5	0.0648738
							3.6	0.0648738
							3.7	0.0648738
							3.8	0.0648738
							3.9	0.0648738
							4	0.0648738
							4.1	0.0648738
							4.2	0.0648738
							4.3	0.0648738
							4.4	0.0648738
							4.5	0.0648738
							4.6	0.0648738
							4.7	0.0648738
							4.8	0.0648738
							4.9	0.0648738
							5	0.0648738
							5.1	0.0648738
							5.2	0.0648738
							5.3	0.0648738
							5.4	0.0648738
							5.5	0.0648738
							5.6	0.0648738
							5.7	0.0648738
							5.8	0.0648738
							5.9	0.0648738
							6	0.0648738
							6.1	0.0648738
							6.2	0.0648738
							6.3	0.0648738
							6.4	0.0648738
							6.5	0.0648738
							6.6	0.0648738
							6.7	0.0648738
							6.8	0.0648738
							6.9	0.0648738
							7	0.0648738
							7.1	0.0648738
							7.2	0.0648738
							7.3	0.0648738
							7.4	0.0648738
							7.5	0.0648738
							7.6	0.0648738
							7.7	0.0648738
							7.8	0.0648738
							7.9	0.0648738
							8	0.0648738
							8.1	0.0648738
							8.2	0.0648738
							8.3	0.0648738
							8.4	0.0648738
							8.5	0.0648738
							8.6	0.0648738
							8.7	0.0648738
							8.8	0.0648738
							8.9	0.0648738
							9	0.0648738
							9.1	0.0648738
							9.2	0.0648738
							9.3	0.0648738
							9.4	0.0648738
							9.5	0.0648738
							9.6	0.0648738
							9.7	0.0648738
							9.8	0.0648738
							9.9	0.0648738
							10	0.0648738
