# Supplementary material
Source: Research Square preprint supplement (doi:10.21203/rs.3.rs-8744593/v1)
Supplement: Supplementary file 16 [file 743e9f65c38d5ed5019720e4.xlsx]

## Sheet: NGC7793
	ρ(r) = ρ0sech^8( r/ r_c)
M(R) =4πρ0,r_c^3 ·I(u)		u = R/r_c	I(u) = Integrale de 0 à u de ( x^2sech^8(x)dx				V_TURI(R) = Racine (G·M(R)/R)
							G=	4.3009e-06	10^-6,KPC,(Km/s)^2/Mo
NGC7793	R_core≈R_max/2=	3.85	V_obs(R_core)=	112
	M_totale=	V_obs^2(R_core).R_core/G=		1.12289e+10	Mo	I(infini)=	0.0648738
						M(R) = racine(G,M(R)/R)
	r_c=R_core=	3.85	ρ0=M_tot/4.π.r_c^3.I(infini)=	2.41366e+08	Mo/kpc^3	π=	3.14159
R	V_obs	Incer V_obs	u=R/r-c	I(U) par table	M(R)	V_TURI	Erreur %		calculs intermediaires de I(u)
0.11	9.1	8.5	0.0285714	8.5512e-06	1.48011e+06	7.60731	16.4		0.02	2.9964e-06	0.03	9.477e-06	0.142857	0.857143
0.14	17.6	7.4	0.0363636	1.73888e-05	3.0098e+06	9.61577	45.36		0.03	9.477e-06	0.04	2.19098e-05	0.363636	0.636364
0.17	19.3	7.4	0.0441558	3.03564e-05	5.25435e+06	11.5296	40.26		0.04	2.19098e-05	0.05	4.22345e-05	0.584416	0.415584
0.21	24.8	6.4	0.0545455	5.59247e-05	9.67992e+06	14.0801	43.23		0.05	4.22345e-05	0.06	7.2353e-05	0.545455	0.454545
0.24	30	7.2	0.0623377	8.21169e-05	1.42135e+07	15.9597	46.8		0.06	7.2353e-05	0.07	0.000114121	0.766234	0.233766
0.28	35	7.3	0.0727273	0.00012918	2.23595e+07	18.5324	47.05		0.07	0.000114121	0.08	0.000169338	0.727273	0.272727
0.32	38.3	7.6	0.0831169	0.000191281	3.31086e+07	21.0948	44.92		0.08	0.000169338	0.09	0.00023974	0.688312	0.311688
0.35	42.7	8.8	0.0909091	0.000247672	4.28692e+07	22.9519	46.25		0.09	0.00023974	0.1	0.000326993	0.909091	0.0909091
0.39	47	5.3	0.101299	0.000340719	5.89746e+07	25.5023	45.74		0.1	0.000326993	0.11	0.000432683	0.87013	0.12987
0.42	49.8	5.6	0.109091	0.000423075	7.32294e+07	27.3841	45.01		0.1	0.000326993	0.11	0.000432683	0.0909091	0.909091
0.46	52.2	6.2	0.119481	0.000551784	9.55073e+07	29.8827	42.75		0.11	0.000432683	0.12	0.00055831	0.0519481	0.948052
0.49	53.4	6.3	0.127273	0.000665198	1.15138e+08	31.79	40.47		0.12	0.00055831	0.13	0.000705281	0.272727	0.727273
0.53	54.6	5.9	0.137662	0.000835253	1.44573e+08	34.2519	37.27		0.13	0.000705281	0.14	0.000874905	0.233766	0.766234
0.56	55.5	6.9	0.145455	0.000980443	1.69703e+08	36.102	34.95		0.14	0.000874905	0.15	0.00106839	0.454545	0.545455
0.6	55.9	7.5	0.155844	0.00119605	2.07023e+08	38.5224	31.09		0.15	0.00106839	0.16	0.00128683	0.415584	0.584416
0.63	58.3	7.4	0.163636	0.0013757	2.38118e+08	40.3186	30.84		0.16	0.00128683	0.17	0.00153122	0.636364	0.363636
0.66	59.3	6.3	0.171429	0.00156997	2.71743e+08	42.0811	29.04		0.17	0.00153122	0.18	0.00180243	0.857143	0.142857
0.7	59.5	6.7	0.181818	0.00185675	3.21381e+08	44.4366	25.32		0.18	0.00180243	0.19	0.0021012	0.818182	0.181818
0.87	59.1	5.1	0.225974	0.00341607	5.91282e+08	54.0652	8.52		0.22	0.00316865	0.23	0.00358281	0.402597	0.597403
1.05	62.6	5.5	0.272727	0.00568734	9.84412e+08	63.5	1.44		0.27	0.00553437	0.28	0.00609525	0.727273	0.272727
1.22	65.6	4.8	0.316883	0.00840888	1.45548e+09	71.6313	9.19		0.31	0.00794677	0.32	0.00861814	0.311688	0.688312
1.4	70.7	4.6	0.363636	0.01184	2.04936e+09	79.346	12.23		0.36	0.0115524	0.37	0.0123432	0.636364	0.363636
1.57	73.9	4	0.407792	0.0155087	2.68437e+09	85.7534	16.04		0.4	0.0148341	0.41	0.0156998	0.220779	0.779221
1.75	78.5	4.2	0.454545	0.0197256	3.41427e+09	91.603	16.69		0.45	0.0193033	0.46	0.0202324	0.545455	0.454545
1.92	82.4	4.6	0.498701	0.0238955	4.13603e+09	96.2545	16.81		0.49	0.0230649	0.5	0.0240195	0.12987	0.87013
2.1	87.1	4.9	0.545455	0.0283749	4.91136e+09	100.293	15.15		0.54	0.0278534	0.55	0.0288094	0.454545	0.545455
2.27	89.6	5.4	0.58961	0.0325502	5.63406e+09	103.318	15.31		0.58	0.0316515	0.59	0.0325866	0.038961	0.961039
2.45	94.9	5.7	0.636364	0.0368024	6.37007e+09	105.747	11.43		0.63	0.0362384	0.64	0.0371247	0.363636	0.636364
2.62	98.1	5	0.680519	0.040583	7.02445e+09	107.383	9.46		0.68	0.0405405	0.69	0.0413589	0.948052	0.0519481
2.79	99.3	5.7	0.724675	0.0440737	7.62864e+09	108.443	9.21		0.72	0.0437208	0.73	0.0444756	0.532468	0.467532
2.97	98.6	7.2	0.771429	0.0474209	8.208e+09	109.024	10.57		0.77	0.0473253	0.78	0.0479944	0.857143	0.142857
3.16	101	8.7	0.820779	0.0505404	8.74796e+09	109.116	8.04		0.82	0.0504951	0.83	0.0510765	0.922078	0.0779221
3.33	103	9.4	0.864935	0.05297	9.16849e+09	108.819	5.65		0.86	0.0527169	0.87	0.0532297	0.506494	0.493506
3.51	107	9.1	0.911688	0.055189	9.55258e+09	108.19	1.11		0.91	0.0551161	0.92	0.0555478	0.831169	0.168831
3.68	114	7.4	0.955844	0.0569691	9.8607e+09	107.352	5.83		0.95	0.0567517	0.96	0.0571237	0.415584	0.584416
3.85	112	8.1	1	0.0584738	1.01211e+10	106.332	5.06		1	0.0584738	1.01	0.0587786	1	0
						Erreur moy	24.18
	Précision=	75.82	%
R	V_Obs	Incer V_Obs	V_TURI	A=(V_obs-V_TURI)^2	A/Incer V_Obs^2
0.11	9.1	8.5	7.61	2.22	0.03	1
0.14	17.6	7.4	9.62	63.68	1.16	2
0.17	19.3	7.4	11.53	60.37	1.1	3
0.21	24.8	6.4	14.08	114.92	2.81	4
0.24	30	7.2	15.96	197.12	3.8	5
0.28	35	7.3	18.53	271.26	5.09	6
0.32	38.3	7.6	21.09	296.18	5.13	7
0.35	42.7	8.8	22.95	390.06	5.04	8
0.39	47	5.3	25.5	462.25	16.46	9
0.42	49.8	5.6	27.38	502.66	16.03	10
0.46	52.2	6.2	29.88	498.18	12.96	11
0.49	53.4	6.3	31.79	466.99	11.77	12
0.53	54.6	5.9	34.25	414.12	11.9	13
0.56	55.5	6.9	36.1	376.36	7.91	14
0.6	55.9	7.5	38.52	302.06	5.37	15
0.63	58.3	7.4	40.32	323.28	5.9	16
0.66	59.3	6.3	42.08	296.53	7.47	17
0.7	59.5	6.7	44.44	226.8	5.05	18
0.87	59.1	5.1	54.07	25.3	0.97	19
1.05	62.6	5.5	63.5	0.81	0.03	20
1.22	65.6	4.8	71.63	36.36	1.58	21
1.4	70.7	4.6	79.35	74.82	3.54	22
1.57	73.9	4	85.75	140.42	8.78	23
1.75	78.5	4.2	91.6	171.61	9.73	24
1.92	82.4	4.6	96.25	191.82	9.07	25
2.1	87.1	4.9	100.29	173.98	7.25	26
2.27	89.6	5.4	103.32	188.24	6.46	27
2.45	94.9	5.7	105.75	117.72	3.62	28
2.62	98.1	5	107.38	86.12	3.44	29
2.79	99.3	5.7	108.44	83.54	2.57	30
2.97	98.6	7.2	109.02	108.58	2.09	31
3.16	101	8.7	109.12	65.93	0.87	32
3.33	103	9.4	108.82	33.87	0.38	33
3.51	107	9.1	108.19	1.42	0.02	34
3.68	114	7.4	107.35	44.22	0.81	35
3.85	112	8.1	106.33	32.15	0.49	36
				X^2/d_f=	5.19

## Sheet: Integrale
							u	I(u) = Integrale de 0 à u de ( x^2sech^8(x)dx
							0	0
							0.01	4.998e-07
							0.02	2.9964e-06
							0.03	9.477e-06
							0.04	2.19098e-05
							0.05	4.22345e-05
							0.06	7.2353e-05
							0.07	0.000114121
							0.08	0.000169338
							0.09	0.00023974
							0.1	0.000326993
							0.11	0.000432683
							0.12	0.00055831
							0.13	0.000705281
							0.14	0.000874905
							0.15	0.00106839
							0.16	0.00128683
							0.17	0.00153122
							0.18	0.00180243
							0.19	0.0021012
							0.2	0.00242817
							0.21	0.00278386
							0.22	0.00316865
							0.23	0.00358281
							0.24	0.0040265
							0.25	0.00449973
							0.26	0.00500242
							0.27	0.00553437
							0.28	0.00609525
							0.29	0.00668465
							0.3	0.00730203
							0.31	0.00794677
							0.32	0.00861814
							0.33	0.00931532
							0.34	0.0100374
							0.35	0.0107835
							0.36	0.0115524
							0.37	0.0123432
							0.38	0.0131545
							0.39	0.0139853
							0.4	0.0148341
							0.41	0.0156998
							0.42	0.0165809
							0.43	0.0174761
							0.44	0.0183841
							0.45	0.0193033
							0.46	0.0202324
							0.47	0.02117
							0.48	0.0221146
							0.49	0.0230649
							0.5	0.0240195
							0.51	0.0249769
							0.52	0.025936
							0.53	0.0268952
							0.54	0.0278534
							0.55	0.0288094
							0.56	0.0297618
							0.57	0.0307096
							0.58	0.0316515
							0.59	0.0325866
							0.6	0.0335138
							0.61	0.0344321
							0.62	0.0353406
							0.63	0.0362384
							0.64	0.0371247
							0.65	0.0379988
							0.66	0.0388598
							0.67	0.0397073
							0.68	0.0405405
							0.69	0.0413589
							0.7	0.042162
							0.71	0.0429495
							0.72	0.0437208
							0.73	0.0444756
							0.74	0.0452137
							0.75	0.0459348
							0.76	0.0466387
							0.77	0.0473253
							0.78	0.0479944
							0.79	0.0486459
							0.8	0.0492799
							0.81	0.0498963
							0.82	0.0504951
							0.83	0.0510765
							0.84	0.0516405
							0.85	0.0521872
							0.86	0.0527169
							0.87	0.0532297
							0.88	0.0537258
							0.89	0.0542054
							0.9	0.0546687
							0.91	0.0551161
							0.92	0.0555478
							0.93	0.0559641
							0.94	0.0563653
							0.95	0.0567517
							0.96	0.0571237
							0.97	0.0574816
							0.98	0.0578256
							0.99	0.0581563
							1	0.0584738
							1.01	0.0587786
							1.02	0.0590711
							1.03	0.0593515
							1.04	0.0596202
							1.05	0.0598777
							1.06	0.0601242
							1.07	0.06036
							1.08	0.0605857
							1.09	0.0608014
							1.1	0.0610075
							1.11	0.0612044
							1.12	0.0613924
							1.13	0.0615718
							1.14	0.061743
							1.15	0.0619061
							1.16	0.0620617
							1.17	0.0622099
							1.18	0.062351
							1.19	0.0624853
							1.2	0.0626131
							1.21	0.0627347
							1.22	0.0628503
							1.23	0.0629602
							1.24	0.0630646
							1.25	0.0631638
							1.26	0.063258
							1.27	0.0633474
							1.28	0.0634321
							1.29	0.0635126
							1.3	0.0635888
							1.31	0.0636611
							1.32	0.0637296
							1.33	0.0637945
							1.34	0.0638559
							1.35	0.0639141
							1.36	0.0639691
							1.37	0.0640212
							1.38	0.0640705
							1.39	0.064117
							1.4	0.0641611
							1.41	0.0642027
							1.42	0.064242
							1.43	0.0642791
							1.44	0.0643142
							1.45	0.0643473
							1.46	0.0643785
							1.47	0.064408
							1.48	0.0644358
							1.49	0.064462
							1.5	0.0644867
							1.51	0.06451
							1.52	0.064532
							1.53	0.0645527
							1.54	0.0645722
							1.55	0.0645905
							1.56	0.0646078
							1.57	0.0646241
							1.58	0.0646394
							1.59	0.0646538
							1.6	0.0646674
							1.61	0.0646801
							1.62	0.0646921
							1.63	0.0647034
							1.64	0.064714
							1.65	0.0647239
							1.66	0.0647333
							1.67	0.0647421
							1.68	0.0647504
							1.69	0.0647581
							1.7	0.0647654
							1.71	0.0647723
							1.72	0.0647787
							1.73	0.0647847
							1.74	0.0647904
							1.75	0.0647957
							1.76	0.0648007
							1.77	0.0648053
							1.78	0.0648097
							1.79	0.0648138
							1.8	0.0648177
							1.81	0.0648213
							1.82	0.0648247
							1.83	0.0648278
							1.84	0.0648308
							1.85	0.0648336
							1.86	0.0648362
							1.87	0.0648386
							1.88	0.0648409
							1.89	0.0648431
							1.9	0.0648451
							1.91	0.0648469
							1.92	0.0648487
							1.93	0.0648503
							1.94	0.0648519
							1.95	0.0648533
							1.96	0.0648547
							1.97	0.0648559
							1.98	0.0648571
							1.99	0.0648582
							2	0.0648592
							2.01	0.0648602
							2.02	0.0648611
							2.03	0.0648619
							2.04	0.0648627
							2.05	0.0648635
							2.06	0.0648642
							2.07	0.0648648
							2.08	0.0648654
							2.09	0.064866
							2.1	0.0648665
							2.11	0.064867
							2.12	0.0648674
							2.13	0.0648679
							2.14	0.0648683
							2.15	0.0648686
							2.16	0.064869
							2.17	0.0648693
							2.18	0.0648696
							2.19	0.0648699
							2.2	0.0648702
							2.21	0.0648704
							2.22	0.0648706
							2.23	0.0648709
							2.24	0.0648711
							2.25	0.0648712
							2.26	0.0648714
							2.27	0.0648716
							2.28	0.0648717
							2.29	0.0648719
							2.3	0.064872
							2.31	0.0648721
							2.32	0.0648722
							2.33	0.0648724
							2.34	0.0648725
							2.35	0.0648725
							2.36	0.0648726
							2.37	0.0648727
							2.38	0.0648728
							2.39	0.0648729
							2.4	0.0648729
							2.41	0.064873
							2.42	0.064873
							2.43	0.0648731
							2.44	0.0648731
							2.45	0.0648732
							2.46	0.0648732
							2.47	0.0648733
							2.48	0.0648733
							2.49	0.0648733
							2.5	0.0648734
							2.51	0.0648734
							2.52	0.0648734
							2.53	0.0648735
							2.54	0.0648735
							2.55	0.0648735
							2.56	0.0648735
							2.57	0.0648736
							2.58	0.0648736
							2.59	0.0648736
							2.6	0.0648736
							2.61	0.0648736
							2.62	0.0648736
							2.63	0.0648736
							2.64	0.0648737
							2.65	0.0648737
							2.66	0.0648737
							2.67	0.0648737
							2.68	0.0648737
							2.69	0.0648737
							2.7	0.0648737
							2.71	0.0648737
							2.72	0.0648737
							2.73	0.0648737
							2.74	0.0648737
							2.75	0.0648737
							2.76	0.0648738
							2.77	0.0648738
							2.78	0.0648738
							2.79	0.0648738
							2.8	0.0648738
							2.81	0.0648738
							2.82	0.0648738
							2.83	0.0648738
							2.84	0.0648738
							2.85	0.0648738
							2.86	0.0648738
							2.87	0.0648738
							2.88	0.0648738
							2.89	0.0648738
							2.9	0.0648738
							2.91	0.0648738
							2.92	0.0648738
							2.93	0.0648738
							2.94	0.0648738
							2.95	0.0648738
							2.96	0.0648738
							2.97	0.0648738
							2.98	0.0648738
							2.99	0.0648738
							3	0.0648738
							3.1	0.0648738
							3.2	0.0648738
							3.3	0.0648738
							3.4	0.0648738
							3.5	0.0648738
							3.6	0.0648738
							3.7	0.0648738
							3.8	0.0648738
							3.9	0.0648738
							4	0.0648738
							4.1	0.0648738
							4.2	0.0648738
							4.3	0.0648738
							4.4	0.0648738
							4.5	0.0648738
							4.6	0.0648738
							4.7	0.0648738
							4.8	0.0648738
							4.9	0.0648738
							5	0.0648738
							5.1	0.0648738
							5.2	0.0648738
							5.3	0.0648738
							5.4	0.0648738
							5.5	0.0648738
							5.6	0.0648738
							5.7	0.0648738
							5.8	0.0648738
							5.9	0.0648738
							6	0.0648738
							6.1	0.0648738
							6.2	0.0648738
							6.3	0.0648738
							6.4	0.0648738
							6.5	0.0648738
							6.6	0.0648738
							6.7	0.0648738
							6.8	0.0648738
							6.9	0.0648738
							7	0.0648738
							7.1	0.0648738
							7.2	0.0648738
							7.3	0.0648738
							7.4	0.0648738
							7.5	0.0648738
							7.6	0.0648738
							7.7	0.0648738
							7.8	0.0648738
							7.9	0.0648738
							8	0.0648738
							8.1	0.0648738
							8.2	0.0648738
							8.3	0.0648738
							8.4	0.0648738
							8.5	0.0648738
							8.6	0.0648738
							8.7	0.0648738
							8.8	0.0648738
							8.9	0.0648738
							9	0.0648738
							9.1	0.0648738
							9.2	0.0648738
							9.3	0.0648738
							9.4	0.0648738
							9.5	0.0648738
							9.6	0.0648738
							9.7	0.0648738
							9.8	0.0648738
							9.9	0.0648738
							10	0.0648738
